# Supplementary material for: A polyoxomolybdate-based hybrid nano capsule as an antineoplastic agent
Source: Nanoscale Adv. 2023 Oct 6;5(22):6045–52. doi: 10.1039/d3na00459g (PMC10628982; doi:10.1039/d3na00459g)
Supplement: NA-005-D3NA00459G-s001 [file NA-005-D3NA00459G-s001.pdf]

## **Polyoxomolybdate-based hybrid nano capsule as an antineoplastic agent**

Arti Joshi,<sup>†a</sup> Sobhna Acharya,<sup>†a</sup> Neeta Devi,<sup>a</sup> Ruby Gupta,<sup>a</sup> Deepika Sharma<sup>a</sup> and Monika Singh<sup>\*a</sup>

---

<sup>a</sup> *Institute of Nano Science and Technology, Knowledge city, Sector-81, Mohali, Punjab, INDIA*

<sup>†</sup> Both the authors have equal contribution

### **Electronic Supplementary Information (ESI)**

**Single Crystal X-Ray Diffraction.** To study single crystal X-ray diffraction, a crystal of appropriate size was mounted on a capillary. Using a BRUKER AXS SMART-APEX three-circle diffractometer with a CCD area detector ( $K\alpha = 0.71073 \text{ \AA}$ , monochromator: graphite) data was collected.<sup>1</sup> Frames were obtained at  $T = 293$  or  $100 \text{ K}$  by  $\omega$ ,  $\phi$  and  $2\theta$ -rotation at  $10 \text{ s}$  per frame with SAINT.<sup>2</sup> The measured intensities were reduced to  $F^2$  and was corrected for absorption with SADABS. SHELXTL<sup>3</sup> was used to solve the structure, refinement, and data output. Diamond<sup>4</sup> program was used to create the images. The summary of crystallographic data is provided in table S1.

**Other Analytical Techniques.** Using Cu-K radiation ( $1.5418$ ), Powder X-Ray Diffraction (PXRD) investigations were carried out on a Bruker D8 – Advanced Eco X-ray Diffractometer. Agilent Cary 600 series Fourier transform infrared (FT-IR) spectrometer was used to do FT-IR spectroscopic measurements (with KBr) in the  $400\text{--}4000 \text{ cm}^{-1}$  range. Perkin Elmer's STA-8000 performed the thermal analysis (TGA) on well-ground samples in a flowing nitrogen atmosphere at a heating rate of  $10 \text{ }^\circ\text{C/min}$ . The morphology of the solid **1** was investigated by scanning electron microscope (SEM) from JEOL (JSM IT-300) being provided with an energy-dispersive X-ray diffractometer (Bruker) and transmission electron microscopy (TEM); a JEM-2100 instrument which is equipped with an energy-dispersive X-ray spectrometer, operated at an accelerated voltage of  $200 \text{ kV}$ . The NEXSA X-Ray Photoelectron Spectrometer (XPS) instrument of Thermo scientific was used to determine the valence states of the elements.

**In Vitro Biocompatibility and Cytotoxicity Assay:** For in-vitro toxicity measurements, a  $100 \text{ }\mu\text{M}$  stock solution of the solid **1** was prepared in PBS Buffer. The solid was observed to be completely soluble in the solution. The biocompatibility of the solid **1** was determined on the L929 cell line, while the cytotoxic effect of the solid **1** was evaluated on A549, MCF-7, and HepG2 cancer cells by the conventional MTT assay.<sup>37</sup> Briefly,  $100 \text{ }\mu\text{L}$  of the cell suspension containing  $1 \times 10^4 \text{ cells/mL}$  was seeded in a 96-well culture plate. After  $24 \text{ h}$  of incubation at  $37 \text{ }^\circ\text{C}$  under  $5\% \text{ CO}_2$ , the cells were then treated with an aqueous solution of solid **1** at varied concentrations ( $0.1\text{--}100 \text{ }\mu\text{M}$ ) for  $24$ ,  $48$ ,  $72$  and  $96 \text{ hours}$ . After the appropriate treatment period,  $10 \text{ }\mu\text{L}$  of MTT [3-(4, 5-dimethylthiazol-2)-2-diphenyl tetrazolium bromide] reagent solution in PBS ( $5 \text{ mg/mL}$ ) was added and then incubated for an additional  $4 \text{ h}$  at  $37 \text{ }^\circ\text{C}$ . Fifty microliters of DMSO was then added to solubilize the formazan crystals formed, and the optical density was determined at  $595 \text{ nm}$  using a BIO-

RAD microplate reader. The relative tumor inhibition rate (%) was then determined using the equation:

$$\text{inhibition rate (\%)} = [100 - A_t/A_c] * 100$$

where  $A_t$  represents absorbance of treated cells and  $A_c$  represents the absorbance of untreated control cells. For each of the cell lines used, all the experiments were performed in triplicate. GraphPad Prism 6 was used to determine the statistical significance of the data obtained.

If a P value less than 0.05 was achieved, the data was declared as statistically significant as examined by two-way ANOVA analysis keeping a 95% confidence interval.

**DNA Fragmentation assay:** To check the DNA damage caused by Solid 1 DNA Fragmentation assay was done. Here, we use the 100ng of plasmid( pEGEP ) DNA which is incubated with concentration of (50 $\mu$ M) Solid 1 in DNAase free water at hourly time intervals for 3 hours. The reactions were then resolved on a 1.5% agarose gel and photographed.

**Table S1.** Crystal data and structural refinements for **solid 1**

| Parameter                  | <b>(C<sub>6</sub>H<sub>16</sub>N)(C<sub>6</sub>H<sub>15</sub>N)<sub>2</sub>[Mo<sub>8</sub>O<sub>26</sub>].3H<sub>2</sub>O</b> |
|----------------------------|-------------------------------------------------------------------------------------------------------------------------------|
| Formula                    | C18 H52 Mo8 N3 O29                                                                                                            |
| Formula weight, g          | 1542.14 g/mol                                                                                                                 |
| T (K)                      | 293(2)                                                                                                                        |
| Wavelength (Å)             | 0.71073                                                                                                                       |
| Crystal system             | Monoclinic                                                                                                                    |
| Space Group                | P 1 21/c 1 (14)                                                                                                               |
| a (Å)                      | 20.202(4) Å                                                                                                                   |
| b (Å)                      | 11.834(2) Å                                                                                                                   |
| c (Å)                      | 21.348(4) Å                                                                                                                   |
| α (°)                      | 90.00                                                                                                                         |
| β (°)                      | 118.24(3)                                                                                                                     |
| γ (°)                      | 90.00                                                                                                                         |
| V (Å <sup>3</sup> )        | 4496.20(7246) Å <sup>3</sup>                                                                                                  |
| Z                          | 4                                                                                                                             |
| dcalc (gcm <sup>-3</sup> ) | 2.27804 g/cm <sup>3</sup>                                                                                                     |
| μMoKα, (cm <sup>-1</sup> ) | 7.334                                                                                                                         |
| R1(I>2σI)                  | 0.0419                                                                                                                        |
| WR2(all)                   | 0.1111                                                                                                                        |
| CCDC/CSD No.               | 2189304                                                                                                                       |

**Table S2. IC50 values of Solid 1 and cisplatin in Hep-G2, A549, MCF-7**

| Cell line | Solid 1 | Cisplatin |
|-----------|---------|-----------|
| HepG2     | 46      | 66.13     |
| A549      | 39      | 24.4      |
| MCF-7     | 18      | 5.75      |

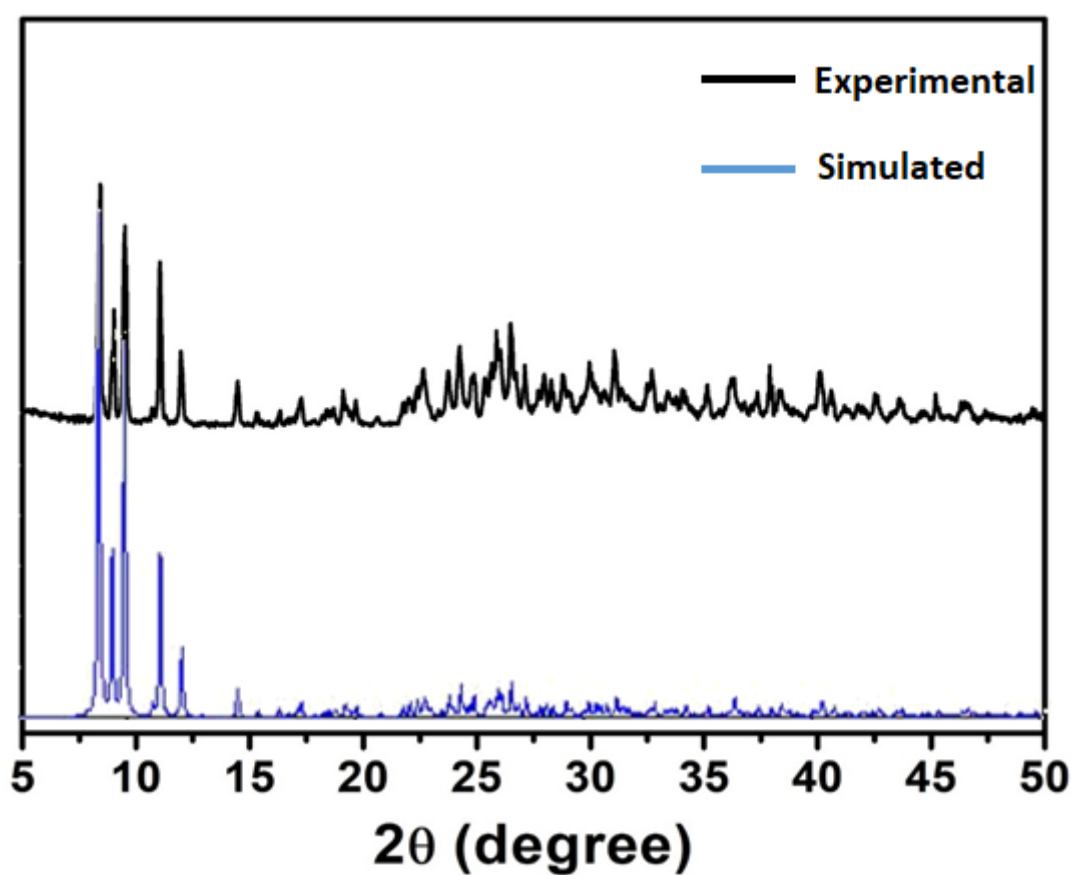

**Fig S1.** Simulated (blue) and experimental (black) XRD patterns of  $(C_6H_{16}N)(C_6H_{15}N)_2[Mo_8O_{26}] \cdot 3H_2O$  (1)

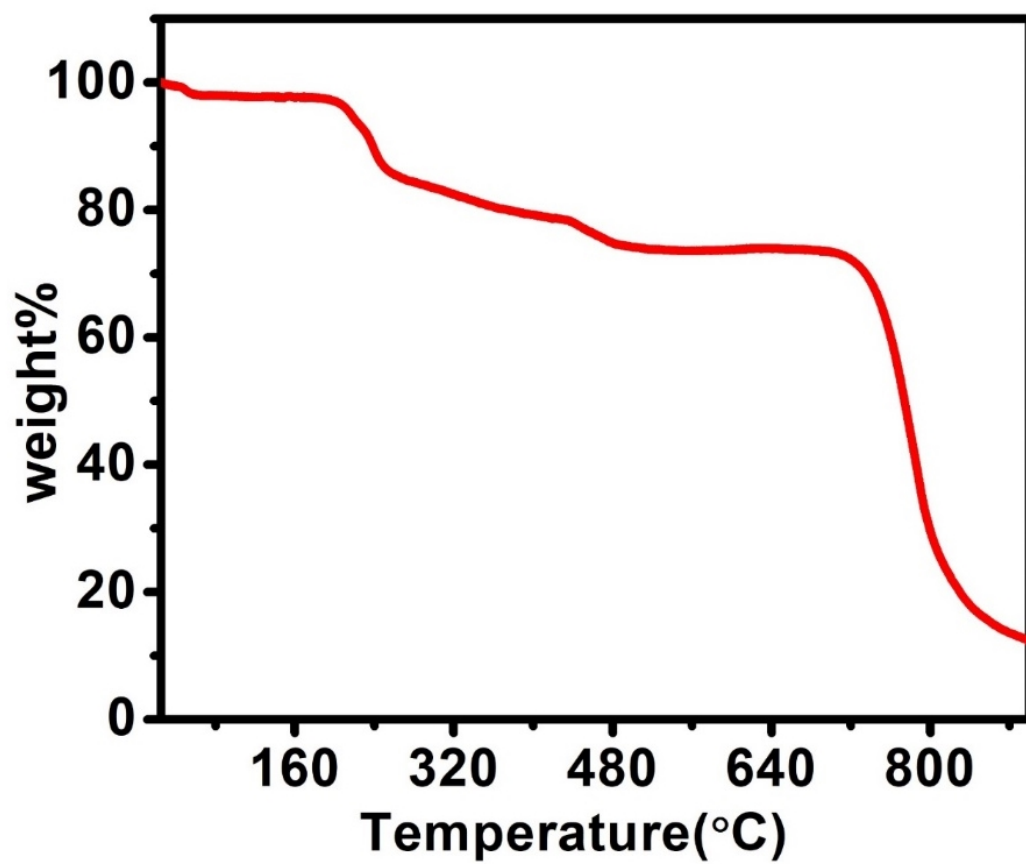

**Fig S2.** Thermogravimetric analysis curve of  $(\text{C}_6\text{H}_{16}\text{N})(\text{C}_6\text{H}_{15}\text{N})_2[\text{Mo}_8\text{O}_{26}]\cdot 3\text{H}_2\text{O}$ , solid **1**

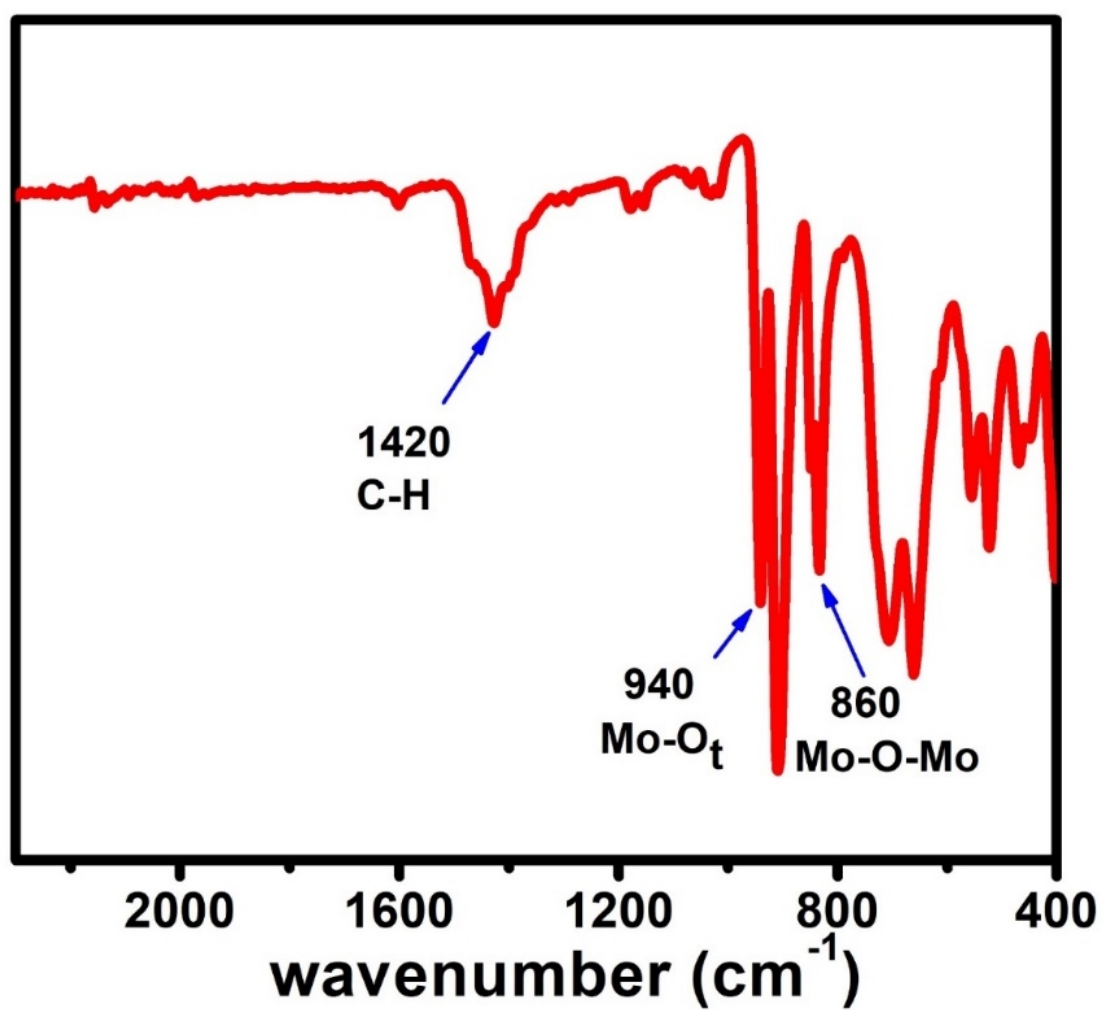

**Fig S3.** FTIR curve of  $(\text{C}_6\text{H}_{16}\text{N})(\text{C}_6\text{H}_{15}\text{N})_2[\text{Mo}_8\text{O}_{26}]\cdot 3\text{H}_2\text{O}$  (1)

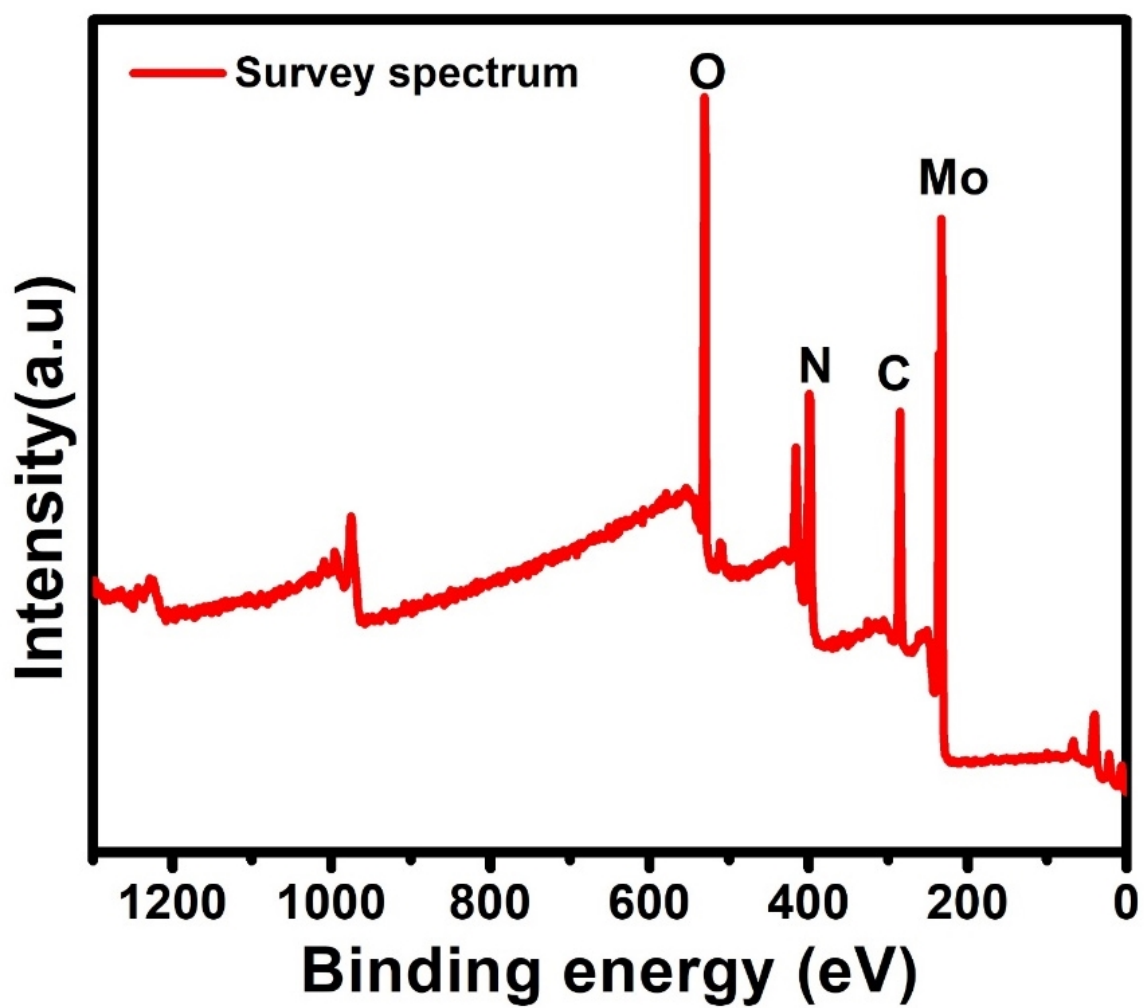

**Fig S4.** XPS Survey spectrum of  $(\text{C}_6\text{H}_{16}\text{N})(\text{C}_6\text{H}_{15}\text{N})_2[\text{Mo}_8\text{O}_{26}]\cdot 3\text{H}_2\text{O}$  (1)

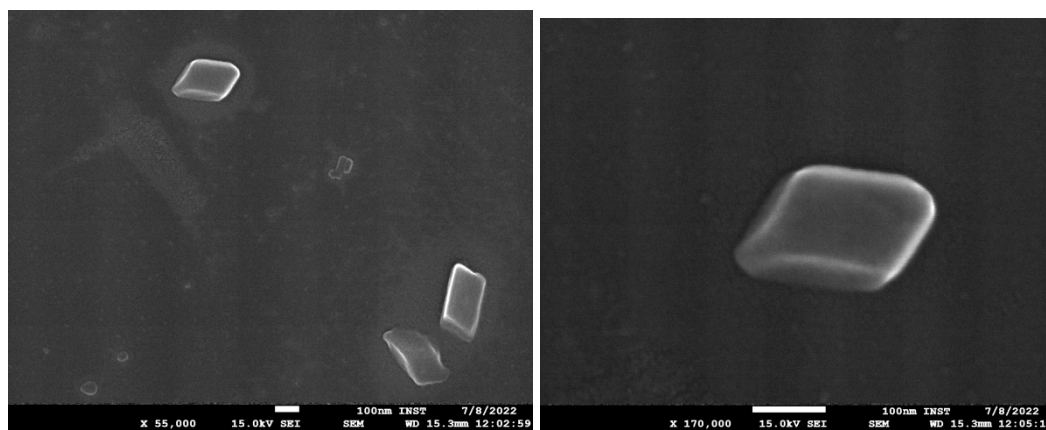

**Fig S5.** FESEM images of  $(\text{C}_6\text{H}_{16}\text{N})(\text{C}_6\text{H}_{15}\text{N})_2[\text{Mo}_8\text{O}_{26}]\cdot 3\text{H}_2\text{O}$  (**1**)

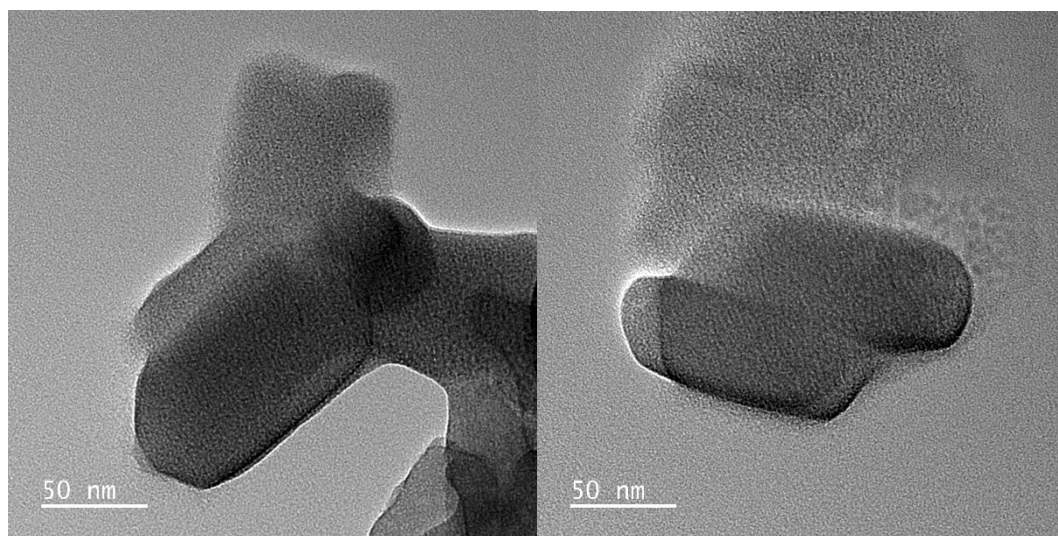

**Fig S6.** TEM images of  $(\text{C}_6\text{H}_{16}\text{N})(\text{C}_6\text{H}_{15}\text{N})_2[\text{Mo}_8\text{O}_{26}]\cdot 3\text{H}_2\text{O}$  (**1**)

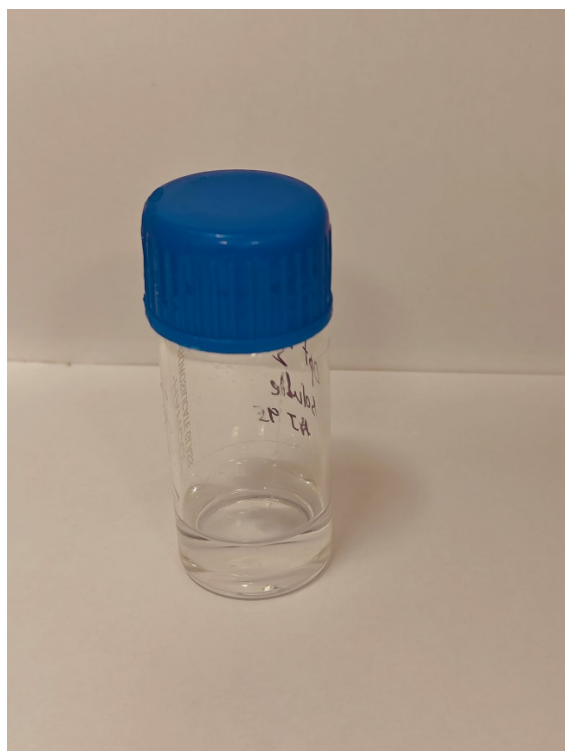

Fig S7. Solubility of solid1 in water(1.8mg/ml)

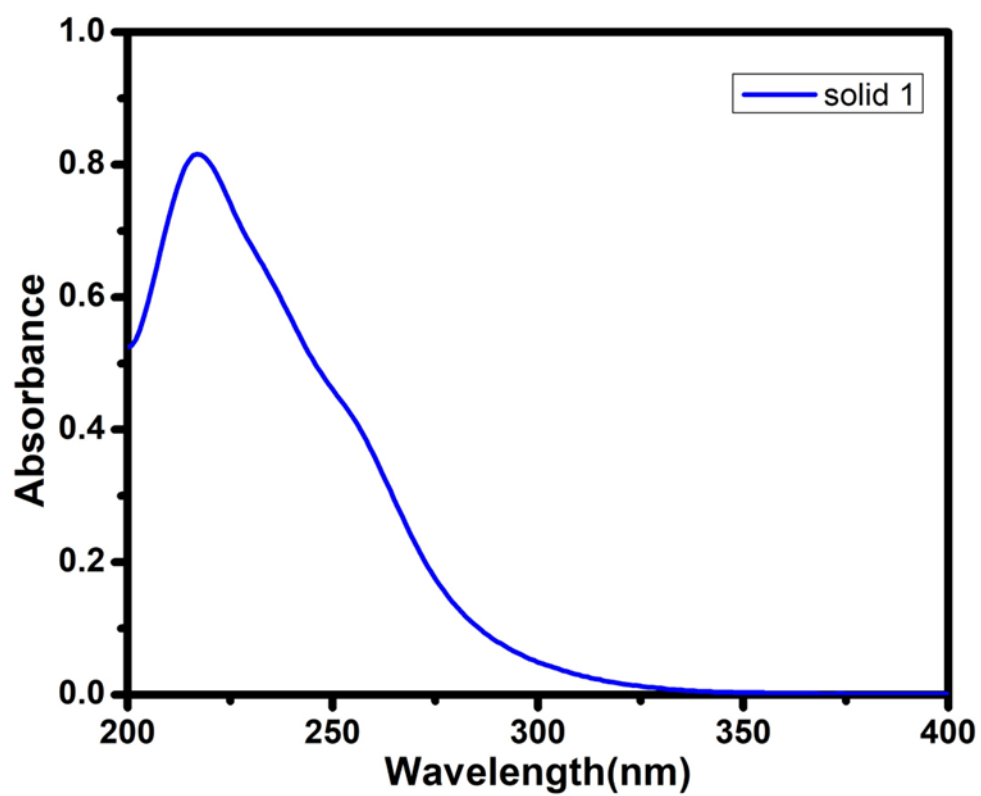

Fig S8. Stability of solid1 in water after dispersing it for 72hrs

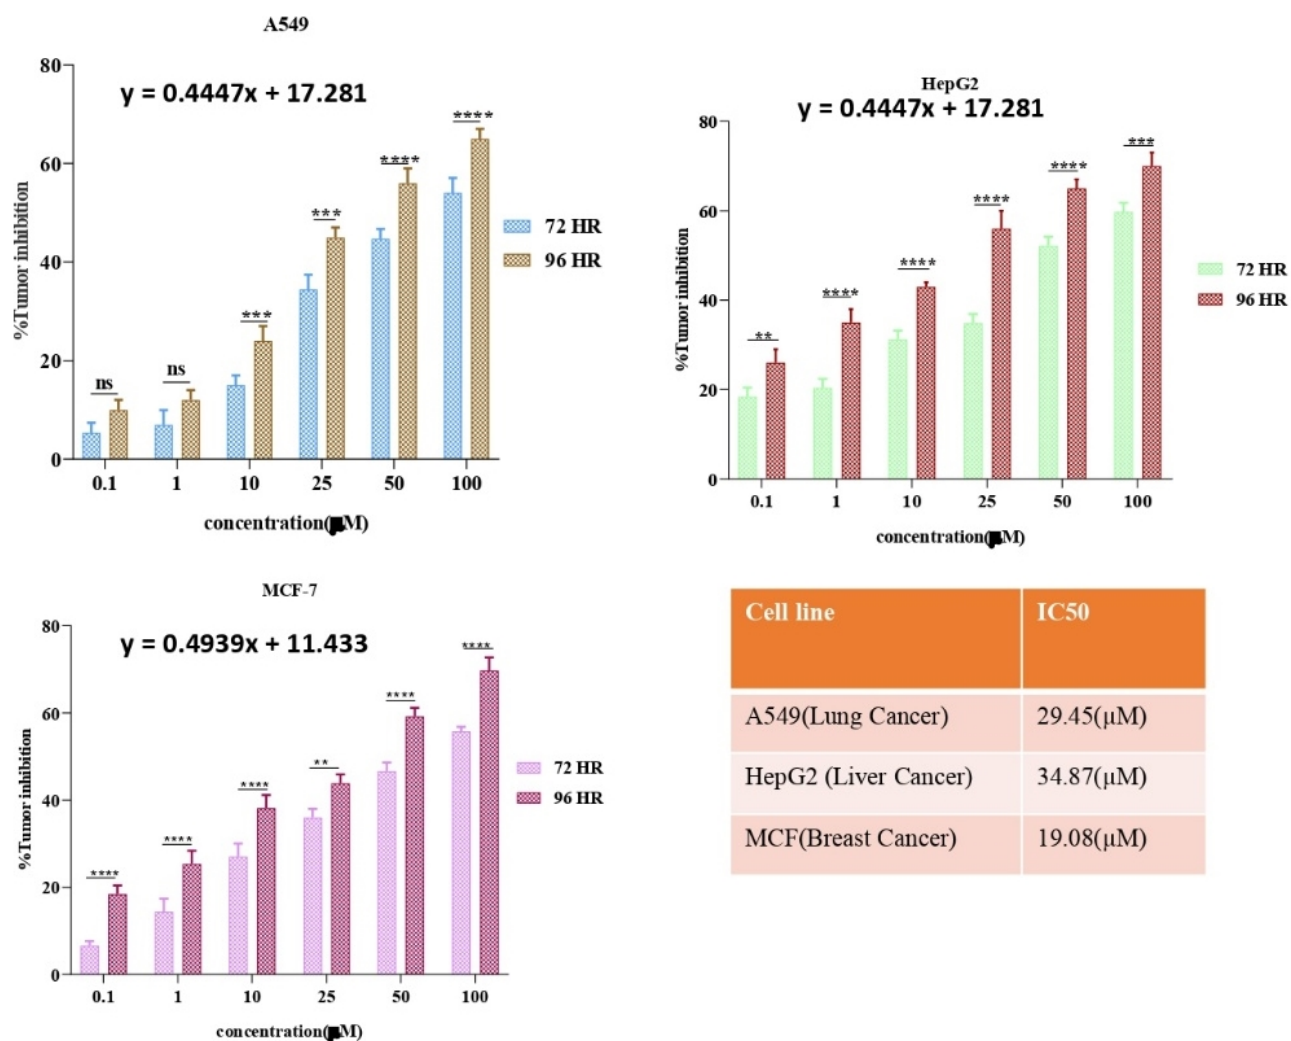

Fig. S9. Cytotoxicity evaluation of the  $(C_6H_{16}N)(C_6H_{15}N)_2[Mo_8O_{26}].3H_2O$ , 1 on various cancer cell lines: (A) HepG2, (B) A549, (C) MCF-7

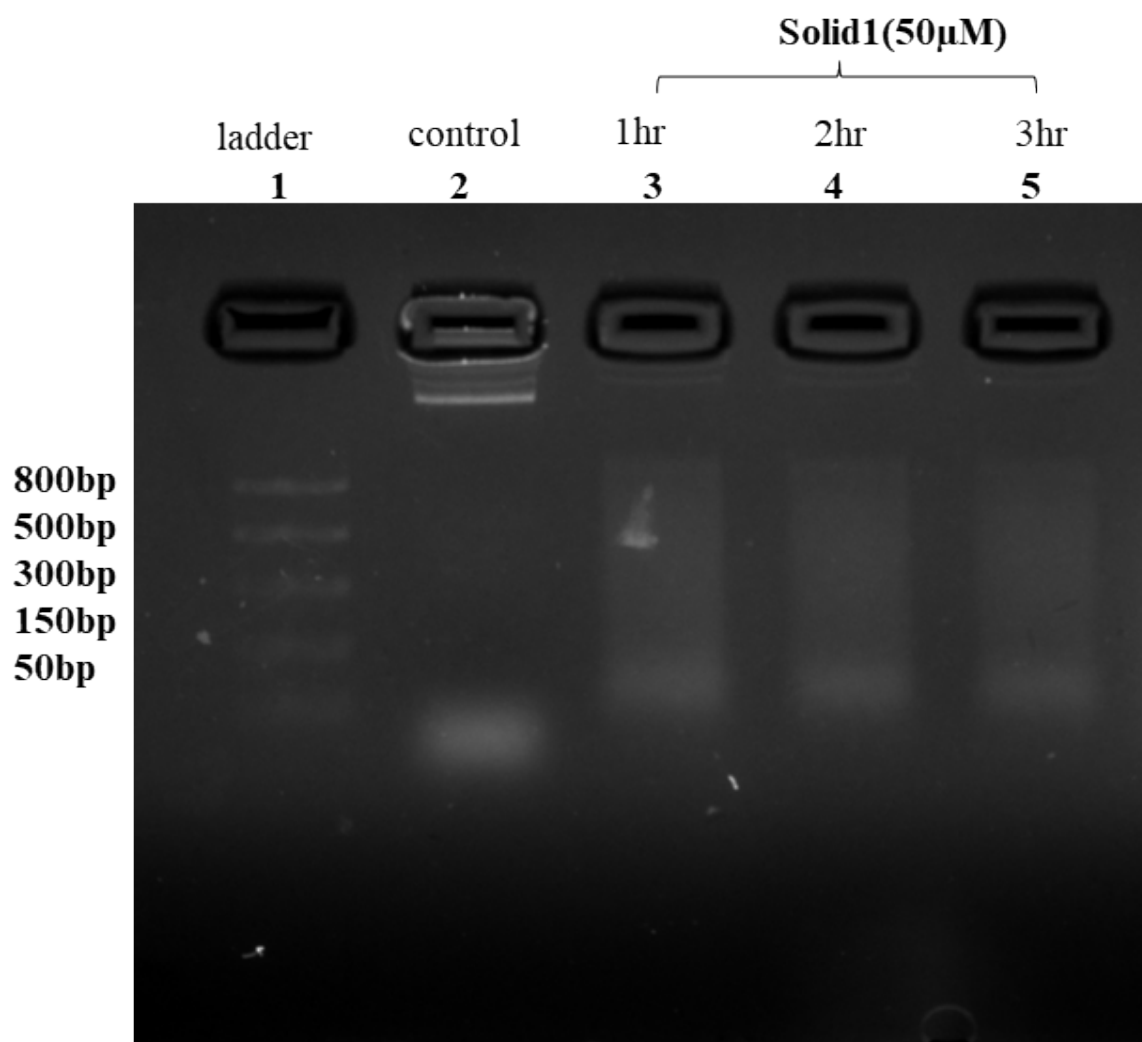

Fig S10. DNA fragmentation assay demonstrates DNA Damage, Supporting Anti-Tumor Mechanisms

**References:**

- (1) Bruker Analytical X-ray Systems, SMART: Bruker Molecular Analysis Research Tool, Version 5.618; Bruker AXS: Madison, WI, 2000.
- (2) Bruker Analytical X-ray Systems, SAINT-NT, Version 6.04; Bruker AXS: Madison, WI, 2001.
- (3) Bruker Analytical X-ray Systems, SHELXTL-NT, Version 6.10; Bruker AXS: Madison WI 2000. S12
- (4) Klaus, B. DIAMOND, version 1.2c; University of Bonn: Germany, 1999
